# Supplementary material for: Correlated Occurrence and Bypass of Frame-Shifting Insertion-Deletions (InDels) to Give Functional Proteins
Source: PLOS journal article supplement (doi:10.1371/journal.pgen.1003882), 2013-10-24

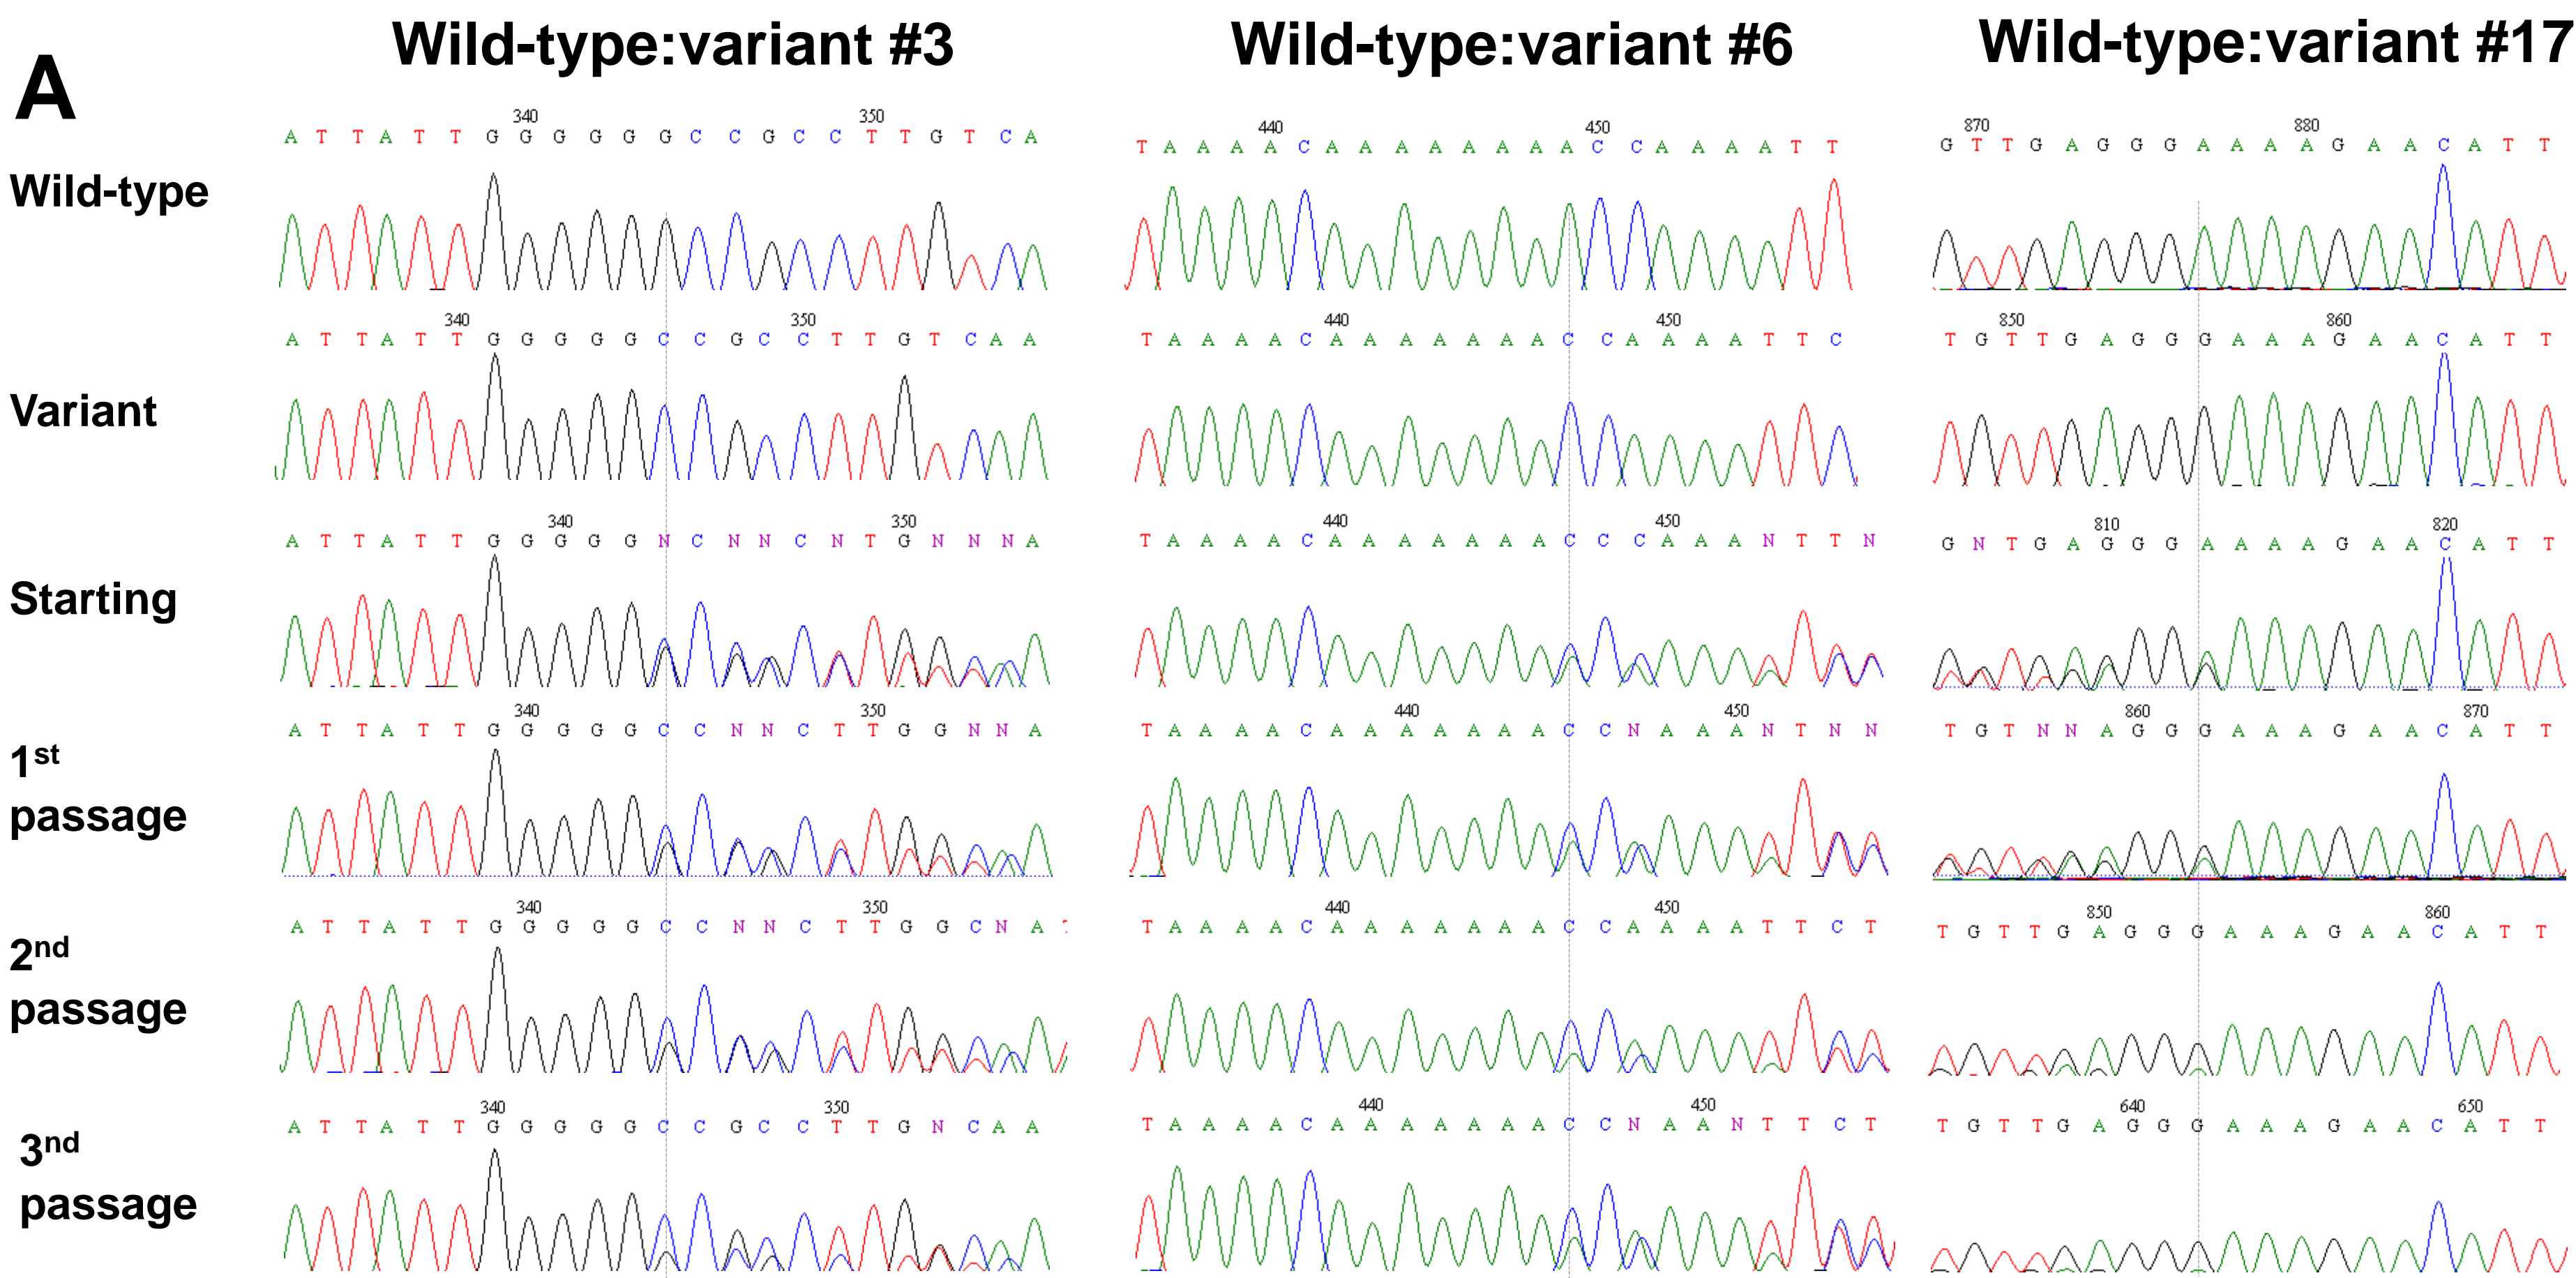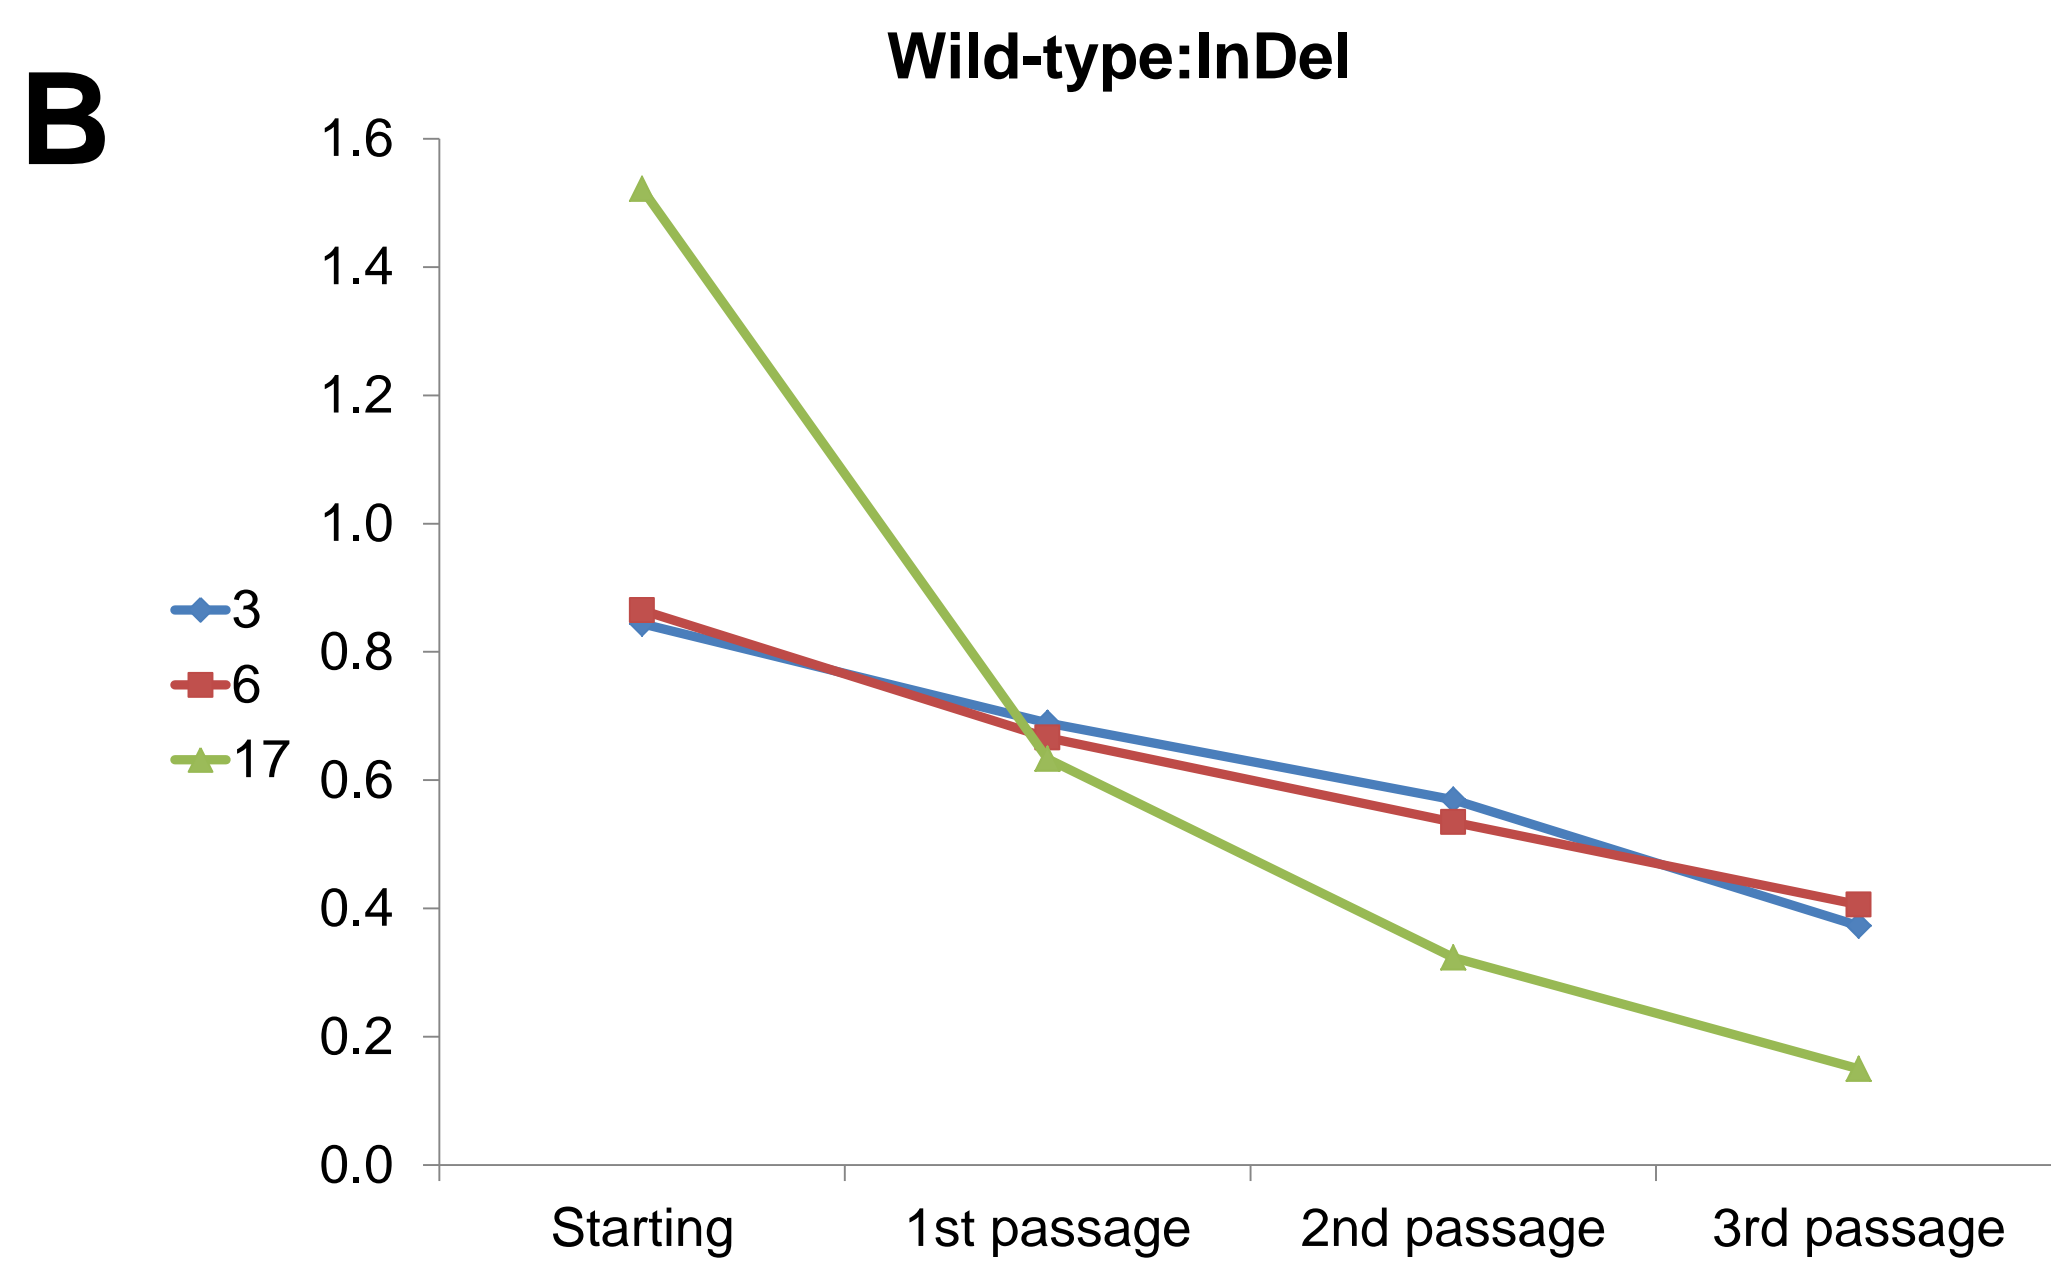

Supplement: S7 (10.1371/journal.pgen.1003882.s007) [file journal.pgen.1003882.s007]
